# Supplementary material for: Disordered layers on WO3 nanoparticles enable photochemical generation of hydrogen from water
Source: Royal Society of Chemistry journal article supplement (doi:10.1039/c8ta09446b), 2018-11-23
Supplement: c8ta09446b1.pdf [file c8ta09446b1.pdf]

## Supporting Information

### Disordered Layers on WO<sub>3</sub> Nanoparticles Enable Photochemical Generation of Hydrogen from Water

Luyang Wang,<sup>a</sup> Chui-Shan Tsang,<sup>a</sup> Wei Liu,<sup>a</sup> Xiandi Zhang,<sup>a</sup> Kan Zhang,<sup>b</sup> Enna Ha,<sup>a</sup> Wai-Ming Kwok,<sup>a</sup> Jong Hyeok Park,<sup>b</sup> Lawrence Yoon Suk Lee,<sup>\*,a</sup> and Kwok-Yin Wong<sup>\*,a</sup>

<sup>a</sup>Department of Applied Biology and Chemical Technology and the State Key Laboratory of Chemical Biology and Drug Discovery, The Hong Kong Polytechnic University, Hung Hom, Hong Kong SAR, China

<sup>b</sup>Department of Chemical and Biomolecular Engineering, Yonsei University, 50 Yonsei-ro, Seodaemun-gu, Seoul 120-749, Republic of Korea

\*Corresponding E-mails: lawrence.y.s.lee@polyu.edu.hk; kwok-yin.wong@polyu.edu.hk

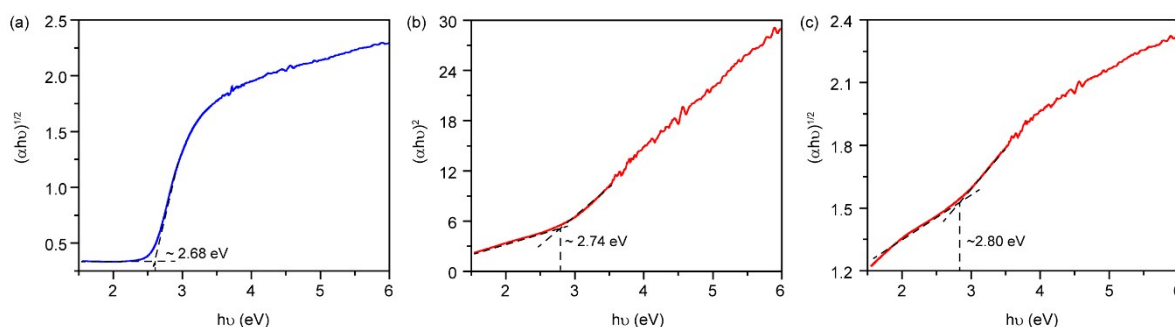

**Figure S1.** Tauc plots of (a)  $\text{WO}_3$  and (b)  $\text{LT-WO}_3$  as direct band gap semiconductor and (c) as indirect band gap semiconductor.

Since there was no pigment introduced to  $\text{LT-WO}_3$ , the increased in absorption background after the intrinsic absorption edge can be attributed to the change in electronic structure comparing to  $\text{WO}_3$  that led to the obvious color change in the sample (**Figure 3b**). For a crystalline semiconductor, the Tauc equation is followed at the band edge in the zone near the optical absorption:  $\alpha h\nu = A(h\nu - E_g)^{n/2}$ . Since  $\text{WO}_3$  is an indirect bandgap semiconductor, the bandgap of  $\text{WO}_3$  was calculated with the  $n$  value of 4 from the Tauc plot which is 2.63 eV. For  $\text{LT-WO}_3$ , since we cannot identify the type of semiconductor (direct bandgap or indirect bandgap), both direct and indirect was plotted. Since the direct plot showed more fitted than indirect plot, the band gap of  $\text{LT-WO}_3$  was determined based on that which is 2.74 eV.

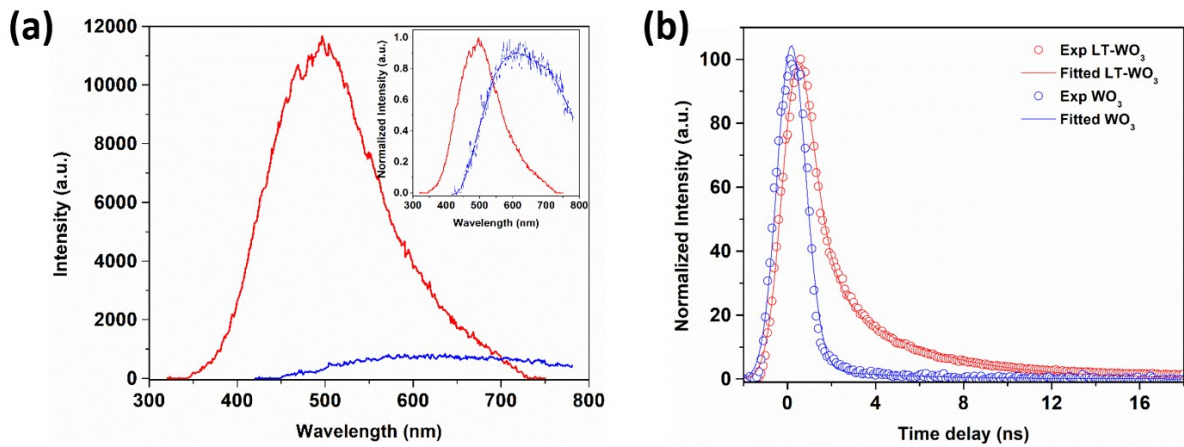

**Figure S2.** (a) Steady state and (b) time-resolved PL spectra on solid-state WO<sub>3</sub> (blue) and LT-WO<sub>3</sub> (red). Excited at 267 nm at room temperature. Inset in (a) is the corresponding normalized PL spectra.

## Reference

1. Yi, Z. *et al.* An orthophosphate semiconductor with photooxidation properties under visible-light irradiation. *Nat Mater* 9, 559-564 (2010).
